# Supplementary material for: Modelled subglacial floods and tunnel valleys control the life cycle of transitory ice streams
Source: Copernicus journal article supplement (doi:10.5194/tc-12-2759-2018), 2018-08-27
Supplement: Supplementary file 1 [file tc-12-2759-2018-supplement.zip]

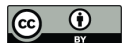

## *Supplement of*

# **Modelled subglacial floods and tunnel valleys control the life cycle of transitory ice streams**

**Thomas Lelandais et al.**

*Correspondence to:* Thomas Lelandais ([thomas.lelandais@univ-lemans.fr](mailto:thomas.lelandais@univ-lemans.fr))

- [tc-12-2759-2018-supplement-title-page.pdf](#)
- [Supplement Titles.docx](#)
- [Supplementary Figure 1.jpg](#)
- [Supplementary Figure 2.jpg](#)
- [Supplementary Figure 3.jpg](#)

The copyright of individual parts of the supplement might differ from the CC BY 4.0 License.
